# Supplementary material
Source: PubMed Central journal article supplement (PMC4063827)
Supplement: epi-9-685-s01.pdf [file epi-9-685-s01.pdf]

## **Supplemental Material to:**

**Paula L Hyland, Laura S Burke, Ruth M Pfeiffer,  
Melissa Rotunno, David Sun, Prasad Patil, Xiaolin Wu,  
Margaret A Tucker, Alisa M Goldstein,  
and Xiaohong Rose Yang**

**Constitutional promoter methylation and risk of familial  
melanoma**

**Epigenetics 2013; 9(5)**

**<http://dx.doi.org/10.4161/epi.28151>**

**[https://www.landesbioscience.com/journals/epigenetics/  
article/28151/](https://www.landesbioscience.com/journals/epigenetics/article/28151/)**

**Table S1.** *P*-values for association between overall methylation of each gene-specific promoter and demographic or cutaneous malignant melanoma (CMM) risk factors among non-carrier controls.

| Risk Factor       | <i>CDH1</i>  | <i>COL1A2</i> | <i>DAPK1</i> | <i>DDIT4L</i> | <i>HSPB6</i> | <i>LOX</i>   | <i>MAGE-A3 (females)</i> | <i>MAGE-A3 (males)</i> | <i>MT1G</i>  | <i>NPM2</i>  | <i>p14ARF</i>    | <i>p16</i>   | <i>PTEN</i>  | <i>RASSF1</i> | <i>TNFRSF10C</i> | <i>TNFRSF10D</i> |
|-------------------|--------------|---------------|--------------|---------------|--------------|--------------|--------------------------|------------------------|--------------|--------------|------------------|--------------|--------------|---------------|------------------|------------------|
| Age at blood draw | 0.179        | 0.070         | 0.748        | <b>0.001</b>  | 0.932        | 0.506        | 0.984                    | 0.878                  | 0.881        | 0.312        | <b>0.003</b>     | 0.122        | 0.656        | 0.529         | 0.494            | 0.261            |
| Gender            | 0.806        | <b>0.038</b>  | 0.858        | 0.198         | 0.134        | 0.280        | --                       | --                     | 0.100        | 0.078        | 0.748            | <b>0.027</b> | 0.701        | 0.674         | 0.060            | 0.557            |
| Dysplastic nevi   | 0.875        | <b>0.042</b>  | 0.940        | 0.847         | 0.967        | <b>0.035</b> | 0.311                    | <b>&lt;.0001</b>       | 0.405        | 0.697        | <b>&lt;.0001</b> | 0.579        | 0.375        | 0.462         | 0.889            | 0.237            |
| Moles             | <b>0.048</b> | <b>0.012</b>  | 0.847        | 0.425         | 0.414        | 0.608        | 0.524                    | <b>0.004</b>           | 0.225        | 0.679        | 0.280            | <b>0.032</b> | 0.174        | 0.787         | 0.250            | <b>0.013</b>     |
| Freckles          | 0.199        | 0.560         | 0.193        | 0.097         | 0.304        | 0.324        | 0.497                    | <b>0.049</b>           | 0.112        | 0.556        | 0.575            | 0.653        | 0.789        | 0.847         | 0.774            | 0.706            |
| Solar injury      | 0.962        | 0.523         | 0.183        | 0.619         | 0.741        | 0.626        | 0.376                    | <b>&lt;.0001</b>       | 0.625        | 0.927        | 0.995            | 0.404        | 0.767        | 0.889         | 0.680            | 0.839            |
| Tanning ability   | 0.744        | 0.513         | 0.784        | 0.157         | 0.975        | 0.672        | 0.080                    | <b>&lt;.0001</b>       | 0.932        | 0.516        | 0.870            | 0.374        | 0.422        | 0.353         | 0.364            | 0.374            |
| Skin type         | 0.315        | 0.628         | 0.633        | 0.700         | 0.648        | 0.785        | 0.511                    | <b>0.0001</b>          | 0.578        | 0.315        | 0.923            | 0.836        | <b>0.035</b> | 0.449         | 0.218            | 0.588            |
| Eye color         | <b>0.009</b> | 0.678         | <b>0.007</b> | <b>0.0004</b> | <b>0.012</b> | <b>0.005</b> | 0.252                    | 0.069                  | 0.183        | <b>0.003</b> | 0.466            | 0.371        | <b>0.019</b> | 0.172         | 0.084            | 0.308            |
| Hair color        | <b>0.004</b> | 0.480         | <b>0.014</b> | 0.477         | <b>0.013</b> | 0.104        | <b>0.014</b>             | <b>&lt;.0001</b>       | <b>0.011</b> | <b>0.005</b> | 0.763            | 0.291        | 0.245        | 0.251         | 0.066            | 0.106            |
| <i>MC1R</i>       | <b>0.019</b> | 0.593         | 0.144        | <b>0.016</b>  | 0.358        | 0.459        | 0.685                    | <b>&lt;.0001</b>       | 0.660        | 0.924        | 0.234            | <b>0.041</b> | <b>0.028</b> | <b>0.004</b>  | 0.880            | 0.245            |

*P*-values were obtained using a generalized estimating equation and adjusting for familial correlation. The significance of each risk factor in non-carrier controls (n= 90) was assessed with all of the other risk factors included in the model. *P*-values <0.05 are bolded. Normality testing of residuals was met for each gene target with the exception of *RASSF1*, *DAPK1* and *CDH1*. For *CDH1* and *DAPK1*, data normality was achieved using log transformation. For *RASSF1*, normality of residuals was not achieved.

**Table S2.** Association between gene-specific promoter methylation and CMM status.

| Promoter                 | Model 1 |        |      |                  | Model 2 |        |      |              |
|--------------------------|---------|--------|------|------------------|---------|--------|------|--------------|
|                          | OR      | 95% CI |      | P                | OR      | 95% CI |      | P            |
| <i>CDH1</i>              | 0.78    | 0.66   | 0.91 | <b>0.002</b>     | 0.84    | 0.71   | 1.00 | 0.052        |
| <i>COL1A2</i>            | 1.00    | 0.98   | 1.02 | 0.906            | 1.00    | 0.97   | 1.03 | 0.991        |
| <i>DAPK1</i>             | 0.76    | 0.63   | 0.93 | 0.007            | 0.78    | 0.61   | 1.01 | 0.056        |
| <i>DDIT4L</i>            | 0.77    | 0.54   | 1.11 | 0.166            | 0.72    | 0.49   | 1.08 | 0.115        |
| <i>HSPB6</i>             | 0.98    | 0.95   | 1.01 | 0.188            | 0.98    | 0.93   | 1.02 | 0.286        |
| <i>LOX</i>               | 0.84    | 0.68   | 1.03 | 0.096            | 1.01    | 0.78   | 1.30 | 0.952        |
| <i>MAGE-A3 (females)</i> | 0.64    | 0.50   | 0.82 | <b>0.001</b>     | 0.75    | 0.63   | 0.89 | <b>0.002</b> |
| <i>MAGE-A3 (males)</i>   | 0.81    | 0.66   | 1.01 | 0.060            |         |        |      |              |
| <i>MT1G</i>              | 0.86    | 0.79   | 0.94 | <b>0.001</b>     | 0.88    | 0.80   | 0.97 | 0.011        |
| <i>NPM2</i>              | 0.79    | 0.51   | 1.21 | 0.275            | 0.82    | 0.53   | 1.27 | 0.372        |
| <i>p14ARF</i>            | 0.30    | 0.12   | 0.74 | 0.009            | 0.28    | 0.10   | 0.77 | 0.013        |
| <i>p16</i>               | 0.75    | 0.42   | 1.32 | 0.319            | 0.64    | 0.35   | 1.18 | 0.155        |
| <i>PTEN</i>              | 0.52    | 0.29   | 0.95 | 0.034            | 0.51    | 0.26   | 0.98 | 0.044        |
| <i>RASSF1</i>            | 0.29    | 0.11   | 0.81 | 0.018            | 0.30    | 0.10   | 0.86 | 0.026        |
| <i>TNFRSF10C</i>         | 0.63    | 0.50   | 0.80 | <b>&lt;0.001</b> | 0.64    | 0.47   | 0.87 | 0.004        |
| <i>TNFRSF10D</i>         | 0.61    | 0.43   | 0.87 | 0.006            | 0.57    | 0.39   | 0.84 | 0.004        |

Model 1: Adjusted for age, sex and *CDKN2A* mutation status.

Model 2: Adjusted for age, sex, *CDKN2A* mutation status, moles and hair color.

*P*-values (*P*) were obtained by comparing CMM cases to unaffected individuals using a generalized estimating equation and adjusting for familial correlation. *P*-value surviving Bonferroni correction for multiple comparisons (0.05/15, *P*= 0.003) are bolded.
